# Supplementary material
Source: PubMed Central journal article supplement (PMC6510982)
Supplement: NIHMS1018312-supplement-Suppl.pdf [file NIHMS1018312-supplement-Suppl.pdf]

Figure S1

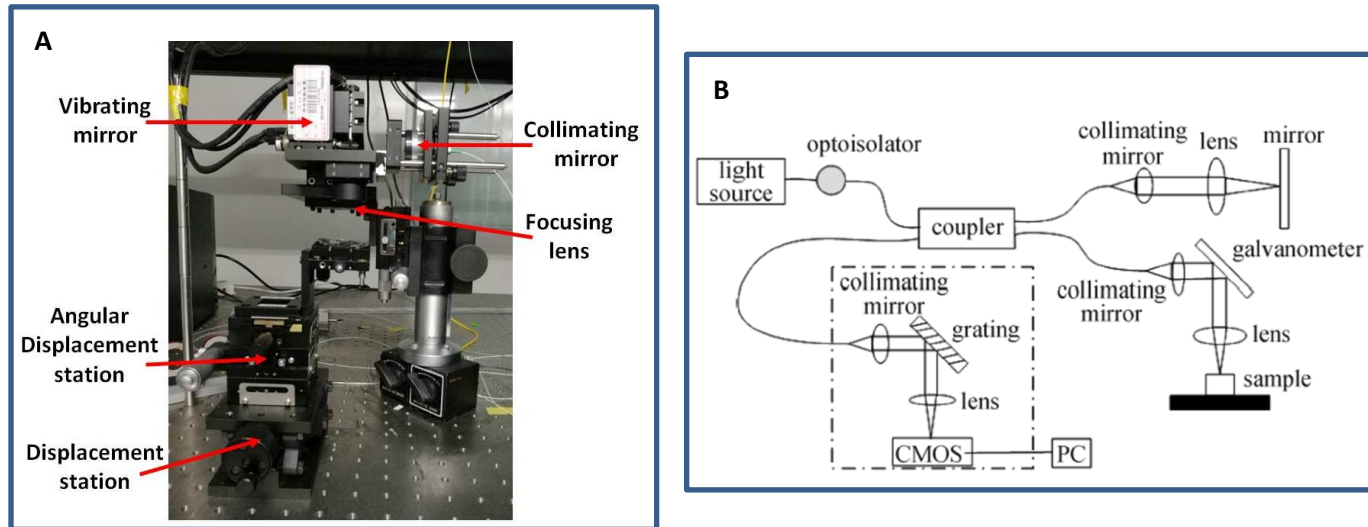

**Figure S1.** (A) Photograph of the SD-OCT system and (B) schematic. CMOS: complementary metal oxide semiconductor; PC: personal computer. (Achromatic collimating lens, OZ optics Ltd., USA; Spectrometer, Wasatch Photonics, USA; Near infrared achromatic lens, TECHSPEC®NearIRdoublets, Edmundoptics, USA; CMOS camera with 4096 pixels, Basler sprint, SPL4096-140k, USA)

**Supplementary Table S1.** List of 10 cases to collect AFF samples

| Case No. | Age | Gender | Hospitalization No. | Diagnosis                                    | Date of Operation |
|----------|-----|--------|---------------------|----------------------------------------------|-------------------|
| 01       | 63  | F      | 352684              | Left Knee Early-Mid-Stage Osteoarthritis     | Sep. 28, 2015     |
| 02       | 57  | F      | 360777              | Right Knee Early-Mid-Stage Osteoarthritis    | Dec. 26, 2015     |
| 03       | 59  | M      | 362823              | Right Knee Early-Mid-Stage Osteoarthritis    | Jan. 18, 2016     |
| 04       | 65  | M      | 372084              | Right Knee Medial Meniscus Injury            | Apr. 27, 2016     |
| 05       | 51  | F      | 384419              | Right Knee Medial Meniscus Injury            | Aug. 30, 2016     |
| 06       | 51  | M      | 388539              | Left Knee Anterior Cruciate Ligament Rupture | Oct. 13, 2016     |
| 07       | 57  | M      | 391067              | Right Knee Early-Mid-Stage Osteoarthritis    | Nov. 08, 2016     |
| 08       | 53  | M      | 391119              | Right Knee Medial collateral ligament injury | Nov. 13, 2016     |
| 09       | 57  | F      | 392965              | Right Knee Early-Mid-Stage Osteoarthritis    | Nov. 25, 2016     |
| 10       | 45  | M      | 402772              | Right Knee Medial Meniscus Injury            | Mar. 14, 2017     |

**Supplementary Table S2.** List of specific components and concentration for the osteogenic, chondrogenic and adipogenic media

|                                     | Components                | Concentration     |
|-------------------------------------|---------------------------|-------------------|
| Osteogenic Differentiation Medium   | Basal medium              | DMEM-HG + 10% FBS |
|                                     | Ascorbate-2-phosphate     | 50 $\mu$ M        |
|                                     | $\beta$ -Glycerophosphate | 1 mM              |
|                                     | Dexamethasone             | 10 nM             |
|                                     | Basal medium              | DMEM-HG           |
| Chondrogenic Differentiation Medium | Dexamethasone             | 100 nM            |
|                                     | Ascorbate-2-phosphate     | 150 $\mu$ M       |
|                                     | ITS                       | 1%                |
|                                     | TGF- $\beta$ 3            | 10 ng/mL          |
|                                     | Sodium Pyruvate           | 100 $\mu$ g/mL    |
| Adipogenic Differentiation Medium   | Basal medium              | DMEM-HG + 10% FBS |
|                                     | Insulin                   | 10 $\mu$ M        |
|                                     | IBMX                      | 0.5 mM            |
|                                     | Dexamethasone             | 1 $\mu$ M         |
|                                     | Indometacin               | 200 $\mu$ M       |

**Supplementary Table S3.** Sequences of primers for RT-qPCR analysis

| Gene   | Size (bp) | Primer Sequence              | Type    | Tm (°C) |
|--------|-----------|------------------------------|---------|---------|
| Col-II | 140       | 5'-GAACTGGTGGAGCAGCAAGA-3'   | Forward | 60      |
|        |           | 5'-GCAGGCGTAGGAAGGTCATC-3'   | Reverse |         |
| ACAN   | 152       | 5'-CAGAACAGTGCCATCATTGC-3'   | Forward | 58      |
|        |           | 5'-AACTCATCCTTGTCTCCATAGC-3' | Reverse |         |
| Sox9   | 195       | 5'-AAGCTCGCGGACCAGTACC-3'    | Forward | 62      |
|        |           | 5'-CTGCCCGTTCTTCACCGACTT-3'  | Reverse |         |
| GAPDH  | 189       | 5'-TGGTATCGTGGAAGGACTCA-3'   | Forward | 60      |
|        |           | 5'-ATGCCAGTGAGCTTCCCGTT-3'   | Reverse |         |
